- Etidocaine: Clinical evaluation for intercostal nerve block and lumbar epidural block. *Anesth Analg* (Cleve) 52:407-413, 1973
7. Scott DB, Jebson PJR, Boyes RN: Pharmacokinetic study of the local anaesthetics bupivacaine (Marcain) and etidocaine (Duranest) in man. *Br J Anaesth* 45:1010-1012, 1973
  8. Keenaghan JB: The determination of lidocaine and prilocaine in whole blood by gas chromatography. *ANESTHESIOLOGY* 29:110-112, 1968
  9. Wilkinson GR, Lund PC: Bupivacaine levels in plasma and cerebrospinal fluid following peridural administration. *ANESTHESIOLOGY* 33:482-486, 1970
  10. Mazze RI, Dunbar RW: Plasma lidocaine concentration after caudal, lumbar epidural, axillary block and intravenous regional anesthesia. *ANESTHESIOLOGY* 27:574-579, 1966
  11. Poppers PJ, Katz RL, Ericson EV, et al: Evaluation of etidocaine, a new local anesthetic agent, with a modified bilateral ulnar nerve-block technique. *ANESTHESIOLOGY* 40: 13-18, 1974
  12. Boyes RN: Absorption, Diffusion, Fixation, Metabolism and Excretion of Local Anesthetic Agents in Animals and Man. *Journées d'enseignement post-universitaire d'anesthésiologie et de réanimation*. C.H.U. Pitie-Salpetriere-Paris, March 1973

## The Effect of Ketamine on the Renin-Angiotensin System

EDWARD D. MILLER, JR., M.D.,\* DANIEL R. BAILEY, M.D.,† JOEL A. KAPLAN, M.D.,\*  
PHILIP W. ROGERS, M.D.‡

Ketamine, in clinical doses, usually increases blood pressure and heart rate. The exact mechanism is unknown, but central autonomic stimulation appears to regulate the peripheral as well as the cardiac effects.<sup>1</sup> Tanaka *et al.*<sup>2</sup> suggested that renin may play a role in the peripheral effects of ketamine in rats. To test this hypothesis in man, we undertook the following study.

### METHOD

Ten healthy patients, ASA status I, 20-40 years of age, were premedicated with atropine, 0.5 mg, intramuscularly, one hour prior to surgery. Two peripheral venous catheters were inserted and control measurements of blood pressure, heart rate, and respiratory rate and a plasma renin sample were obtained. The patients were

slowly given ketamine, 2 mg/kg, intravenously, and were allowed to breathe room air. The operating room was quiet, and 5 and 15 minutes after the initial dose of ketamine, measurements were repeated. The renin samples were assayed by the radioimmunoassay method of Harber *et al.*<sup>3</sup>

### RESULTS

In all patients, blood pressure and heart rate increased 5 and 15 minutes after the initial ketamine injection ( $P < .001$ ) (table 1). In marked contrast, however, renin values did not increase and were not statistically different from the control. In fact, high baseline renin values in Patients 9 and 10 returned to normal range following administration of ketamine.

### DISCUSSION

Ketamine has been shown to produce moderate to marked increases of both systolic and diastolic blood pressures.<sup>4</sup> Dowdy and Kaya found the carotid baroreceptor was altered by ketamine and was responsible for the pressor component of a biphasic pressure response in anesthetized dogs,<sup>5</sup> whereas Virtue and associates suggested that increased release of endogenous catecholamines may be responsible for the blood pressure

\* Staff Anesthesiologist.

† Anesthesia Resident.

‡ Chief, Metabolic Branch, US Army Institute of Surgical Research.

Received from the Anesthesia and Operative Service, Brooke Army Medical Center, Fort Sam Houston, Texas 78234. Accepted for publication October 7, 1974.

The opinions or assertions contained herein are the private views of the authors and are not to be construed as official or as reflecting the views of the Department of the Army or the Department of Defense.

TABLE 1. Renin-Ketamine Data

|                                    | Heart Rate<br>(Beats/Min) | Mean Blood Pressure<br>(torr) | Renin<br>(ng ml <sup>-1</sup> hr <sup>-1</sup> ) |
|------------------------------------|---------------------------|-------------------------------|--------------------------------------------------|
| Control                            |                           |                               |                                                  |
| Patient 1                          | 100                       | 96.7                          | 0.80                                             |
| Patient 2                          | 75                        | 91.7                          | 0.61                                             |
| Patient 3                          | 54                        | 83.3                          | 0.64                                             |
| Patient 4                          | 72                        | 99.3                          | 0.16                                             |
| Patient 5                          | 66                        | 83.3                          | 1.28                                             |
| Patient 6                          | 78                        | 96.6                          | 0.56                                             |
| Patient 7                          | 60                        | 96.6                          | 0.14                                             |
| Patient 8                          | 72                        | 95.0                          | 0.39                                             |
| Patient 9                          | 78                        | 73.3                          | 5.81                                             |
| Patient 10                         | 60                        | 84.0                          | 3.80                                             |
| Mean                               | 71.50                     | 89.99                         | 1.42                                             |
| SD                                 | 12.95                     | 8.50                          | 1.87                                             |
| SE                                 | 4.09                      | 2.68                          | 0.59                                             |
| 5 minutes after ketamine, 2 mg/kg  |                           |                               |                                                  |
| Patient 1                          | 170                       | 111.7                         | 0.59                                             |
| Patient 2                          | 100                       | 116.7                         | 0.22                                             |
| Patient 3                          | 84                        | 116.7                         | 0.60                                             |
| Patient 4                          | 120                       | 117.3                         | 0.28                                             |
| Patient 5                          | 144                       | 103.3                         | 0.19                                             |
| Patient 6                          | 108                       | 113.3                         | 0.30                                             |
| Patient 7                          | 96                        | 133.3                         | 0.13                                             |
| Patient 8                          | 120                       | 120.0                         | 0.31                                             |
| Patient 9                          | 132                       | 110.0                         | 0.53                                             |
| Patient 10                         | 96                        | 112.0                         | 0.84                                             |
| Mean                               | 117.0*                    | 115.43*                       | 0.39                                             |
| SD                                 | 26.08                     | 7.84                          | 0.23                                             |
| SE                                 | 8.25                      | 2.48                          | 0.07                                             |
| 15 minutes after ketamine, 2 mg/kg |                           |                               |                                                  |
| Patient 1                          | 170                       | 110.0                         | 1.21                                             |
| Patient 2                          | 100                       | 98.3                          | 0.06                                             |
| Patient 3                          | 120                       | 120.0                         | 4.66                                             |
| Patient 4                          | 108                       | 106.7                         | 0.84                                             |
| Patient 5                          | 120                       | 96.7                          | 1.42                                             |
| Patient 6                          | 90                        | 116.7                         | 0.20                                             |
| Patient 7                          | 84                        | 123.3                         | 0.14                                             |
| Patient 8                          | 120                       | 106.7                         | 0.62                                             |
| Patient 9                          | 120                       | 100.0                         | 0.90                                             |
| Patient 10                         | 90                        | 103.3                         | 0.78                                             |
| Mean                               | 112.2*                    | 108.16*                       | 1.08                                             |
| SD                                 | 24.89                     | 9.24                          | 1.33                                             |
| SE                                 | 7.84                      | 2.92                          | 0.42                                             |

\*  $P < 0.001$  compared with control value,  $t$  test for paired data.

increase.<sup>6</sup> Traber *et al.*<sup>7</sup> and Kaplan *et al.*<sup>8</sup> have shown that both alpha- and beta-adrenergic blockers are able to partially or completely modify the pressor response to ketamine.

Renin is a proteolytic enzyme devoid of vasoactive properties. It acts upon the circulating alpha-2-globulin, angiotensinogen, to yield the decapeptide fragment angioten-

sin I. Angiotensin I is then converted to the potent vasopressor, angiotensin II, by the action of the converting enzyme in the lung that splits off the two terminal amino acids of angiotensin I. Angiotensin II is the most potent vasopressor known. Since renin is released under a variety of stimuli including adrenergic stimulation,<sup>9</sup> it seemed possible that renin could be released by ketamine and

play an important role in blood pressure regulation, since it does so in normal man<sup>10</sup> as well as in various disease states.<sup>11</sup> However, our study clearly shows that renin is not responsible for the hypertension seen when ketamine is administered.

The authors thank Mr. Leonard Serailee for the renin determinations.

#### REFERENCES

1. Tweed WA, Minnick M, Mymin D: Circulatory responses to ketamine anesthesia. *ANESTHESIOLOGY* 37:613-619, 1972
2. Tanaka K, Pettinger WA, Goth A: Renin release and ketamine induced cardiovascular stimulation in the rat. *Fed Proc* 32:766, 1973
3. Haber E, Koerner T, Page LB, et al: Application of radioimmunoassay for angiotensin I to the physiologic measurements of plasma renin activity in normal human subjects. *J Clin Endocrinol Metab* 29:1349-55, 1969
4. Corssen G, Domino EF: Dissociative anesthesia, further pharmacologic studies and first clinical experience with the phenylethylidene derivative CI-581. *Anesth Analg (Cleve)* 45:29-39, 1966
5. Dowdy EG, Kaya K: Studies of the mechanism of cardiovascular responses to CI-581. *ANESTHESIOLOGY* 29:931-943, 1968
6. Virtue RW, Alanis JM, Mori M, et al: An anesthetic agent: 2 orthochlorophenyl 2 methyl-amino cyclohexanone HCl (CI-581) *ANESTHESIOLOGY* 28:823-833, 1967
7. Traber DL, Wilson RD, Priano LL: The effect of alpha blockade on the cardiopulmonary response to ketamine. *Anesth Analg (Cleve)* 50:737-42, 1971
8. Kaplan J, Cooperman LH: Alarming reactions to ketamine in patients taking thyroid medication—treatment with propranolol. *ANESTHESIOLOGY* 35:229-30, 1971
9. Assaykeen TA, Clayton A, Goldfien A, et al: Effect of alpha- and beta-adrenergic blocking agents on the renin response to hypoglycemia and epinephrine in dogs. *Endocrinology* 87:1318-1322, 1970
10. Worcel M, Meyer P, D'Auriac G, et al: Role of angiotensin in normal blood pressure regulation. *Pluegers Arch* 310:251-263, 1969
11. Haber E: Recent developments in pathophysiological studies of the renin-angiotensin system. *N Engl J Med* 280:148-154, 1969

## Lymphocyte Transformation during Operations with Spinal Anesthesia

JOHN R. KENT, M.D.,\* AND SHARON GEIST, B.S.†

Cellular immunity as tested by *in-vitro* techniques is depressed postoperatively. Both lymphocyte transformation and the incorporation of radioactively labeled thymidine into DNA with phytohemagglutinin (PHA) stimulation have been shown to be impaired following surgical operations.<sup>1,2</sup> Since general anesthesia was

used in previous studies, this study was undertaken to determine whether operations in conjunction with spinal anesthesia also affect lymphocyte responsiveness to PHA.

#### PATIENTS AND METHODS

Seven patients were selected for this study. All underwent elective operations, their ages and surgical procedures being listed in table 1. For spinal anesthesia, tetracaine, 8-10 mg, was instilled. Patient 6 had two transurethral resections of his prostate, separated by a three-month interval. Results from both operations are reported, but only the values from the second operation are included in the statistical analysis, since at the time of the first operation, <sup>3</sup>H-thymidine incorporation studies were not being done. Premedica-

\* Associate Adjunct Professor of Medicine, University of California College of Medicine, Irvine.

† Biological Laboratory Technician.

Received from the Endocrine Section, Medical Service, Long Beach Veterans Administration Hospital, and the Department of Medicine, University of California College of Medicine, Irvine, California. Accepted for publication October 8, 1974.

Address reprint requests to Dr. Kent, Endocrinology, VA Hospital, 5902 East Seventh Street, Long Beach, California 90801.
